# Supplementary material
Source: Research Square preprint supplement (doi:10.21203/rs.3.rs-8815404/v1)
Supplement: Supplementary file 1 [file 495871b3539ef39fe5840e5f.docx]

**Geochemical Evaluation of Groundwater Quality in Yewa for Drinking and Irrigation Purposes**

Adewole Michael Gbadebo1,2, Taiwo Azeez Egbedara1, Oluwajumilo Oluwadara Gbadebo3, Benjamin Onozeyi Dimowo1*

1Department of Environmental Management and Toxicology, Federal University of Agriculture Abeokuta, Ogun State, Nigeria

2Department of Geology, Federal University of Agriculture Abeokuta, Ogun State, Nigeria

3Department of Bioscience, University of East London, London, United Kingdom

***Corresponding Author:** Benjamin Onozeyi Dimowo, dimowo.benjamino@pg.funaab.edu.ng; benjamindimowo@yahoo.com

**Electronic Supplementary Material**

Table S1: Distribution of Groundwater Samples Across Yewa Alongside the Physicochemical Parameters and Ionic Content

| **S/N** | **Location** | **SC** | **LONG** | **LAT** | **ALT** | **T.D** | **S.W.L** | **pH** | **TDS** | **Ca**2+ | **K**+ | **Na**+ | **Mg2+** | **HCO**3- | **SO**42- | **Cl**- |
| --- | --- | --- | --- | --- | --- | --- | --- | --- | --- | --- | --- | --- | --- | --- | --- | --- |
| 1 | Ilaro | ETIL 1 | 2.998611 | 6.884722 | 69.85 | 13 | 4 | 6.9 | 84 | 76 | 14 | 20.4 | 39 | 240 | 55 | 2.8 |
| 2 |  | ETIL 2 | 2.998611 | 6.884722 | 70.12 | 17 | 3 | 7.1 | 72 | 69 | 10 | 14.4 | 36 | 90 | 35 | 2.4 |
| 3 |  | ETIL 3 | 3.001389 | 6.849722 | 70.3 | 15 | 6 | 7 | 193 | 76 | 10 | 12.6 | 30 | 77 | 110 | 2.8 |
| 4 |  | ETIL 4 | 3.000278 | 6.884444 | 69.9 | 16 | 5 | 7 | 154 | 58 | 8 | 15.5 | 23 | 45 | 40 | 2.4 |
| 5 |  | ETIL5 | 2.999444 | 6.884722 | 70.25 | 16 | 5 | 6.9 | 232 | 53 | 6 | 18.2 | 36 | 64 | 35 | 2.8 |
| 6 |  | ETIL 6 | 2.9975 | 6.968056 | 70.05 | 16 | 6 | 6.9 | 118 | 67 | 10 | 18.5 | 91 | 66 | 30 | 2.5 |
| 7 |  | ETIL7 | 2.9975 | 6.885 | 70.18 | 17 | 9 | 6.9 | 31 | 94 | 12 | 14.4 | 86 | 59 | 35 | 3.6 |
| 8 |  | ETIL 8 | 3.001389 | 6.883056 | 70.4 | 15 | 8 | 6.9 | 323 | 89 | 15 | 40.2 | 125 | 240 | 42 | 3.6 |
| 9 |  | ETIL 9 | 3.001667 | 6.885 | 69.95 | 16 | 7 | 7 | 570 | 55 | 12 | 14.6 | 82 | 90 | 38 | 2.4 |
| 10 |  | ETIL 10 | 2.985278 | 6.963889 | 70.1 | 17 | 7 | 7.1 | 222 | 52 | 10 | 15.2 | 73 | 84 | 42 | 2.6 |
| 11 | Ojaodan | ETOD 1 | 2.83833 | 6.900556 | 39.75 | 11 | 4 | 7.1 | 236 | 58 | 12 | 18 | 66 | 45 | 60 | 1.8 |
| 12 |  | ETOD 2 | 2.830167 | 6.8975 | 40.05 | 12 | 4 | 7 | 236 | 51 | 14 | 15.5 | 84 | 120 | 75 | 2.8 |
| 13 |  | ETOD 3 | 2.84 | 6.898056 | 40.2 | 9 | 4 | 7.1 | 243 | 62 | 10 | 18.4 | 90 | 106 | 78 | 2.2 |
| 14 |  | ETOD 4 | 2.840556 | 6.901389 | 39.9 | 11 | 3 | 6.9 | 180 | 73 | 15 | 21.4 | 96 | 145 | 60 | 2.4 |
| 15 |  | ETOD 5 | 2.837778 | 6.901111 | 40.15 | 13 | 5 | 7.1 | 234 | 63 | 12 | 12.6 | 80 | 116 | 80 | 1.6 |
| 16 |  | ETOD 6 | 2.838056 | 6.901667 | 40.35 | 11 | 2 | 6.9 | 109 | 82 | 14 | 15.2 | 76 | 76 | 75 | 1.8 |
| 17 |  | ETOD 7 | 2.840278 | 6.915278 | 40 | 9 | 2 | 7.1 | 122 | 73 | 12 | 18 | 66 | 85 | 60 | 1.5 |
| 18 |  | ETOD 8 | 2.840278 | 6.901389 | 40.1 | 10 | 3 | 7 | 24 | 51 | 14 | 15.5 | 83 | 95 | 85 | 1.6 |
| 19 |  | ETOD 9 | 2.840278 | 6.901389 | 39.85 | 11 | 2 | 6.9 | 144 | 55 | 10 | 18.4 | 91 | 110 | 130 | 3.5 |
| 20 |  | ETOD 10 | 2.8405 | 6.9152 | 40.25 | 12 | 5 | 7 | 241 | 58 | 14 | 17.4 | 86 | 85 | 60 | 2.5 |
| 21 | Imashayi | ETAY 1 | 3.038789 | 7.249991 | 99.8 | 9 | 2 | 6.9 | 721 | 56 | 8 | 18.1 | 31 | 84 | 40 | 1.5 |
| 22 |  | ETAY 2 | 3.0316 | 7.1401 | 100.15 | 11 | 2 | 6.9 | 124 | 75 | 10 | 16.4 | 36 | 96 | 35 | 1.6 |
| 23 |  | ETAY 3 | 3.032081 | 7.233275 | 100.3 | 12 | 3 | 7.1 | 96 | 63 | 12 | 10.6 | 30 | 68 | 36 | 1.7 |
| 24 |  | ETAY 4 | 3.0319 | 7.2333 | 100 | 13 | 3 | 7 | 338 | 55 | 12 | 17.2 | 33 | 80 | 45 | 1.6 |
| 25 |  | ETAY 5 | 3.032081 | 7.233275 | 100.25 | 11 | 4 | 7.1 | 51 | 58 | 15 | 18 | 26 | 60 | 60 | 1.8 |
| 26 |  | ETAY 6 | 3.0314 | 7.2346 | 100.1 | 9 | 3 | 7.1 | 133 | 61 | 11 | 15.5 | 34 | 68 | 50 | 1.8 |
| 27 |  | ETAY 7 | 3.0368 | 7.245994 | 100.4 | 12 | 5 | 6.9 | 328 | 58 | 10 | 15.4 | 31 | 92 | 40 | 1.8 |
| 28 |  | ETAY 8 | 3.0374 | 7.2424 | 99.95 | 14 | 6 | 6.9 | 172 | 56 | 9 | 16.4 | 36 | 55 | 55 | 1.6 |
| 29 |  | ETAY 9 | 3.037419 | 7.244109 | 100.2 | 13 | 3 | 7 | 383 | 59 | 16 | 13.6 | 30 | 79 | 35 | 1.7 |
| 30 |  | ETAY 10 | 3.036898 | 7.245994 | 100.05 | 14 | 8 | 7.1 | 142 | 64 | 8 | 14.2 | 73 | 89 | 110 | 2.8 |
| 31 | Igan Okoto | ETIO 1 | 3.149444 | 7.149444 | 84.8 | 13 | 5 | 7.1 | 242 | 71 | 12 | 20.4 | 39 | 130 | 40 | 2.4 |
| 32 |  | ETIO 2 | 3.04281 | 7.1487 | 85.15 | 12 | 3 | 7 | 266 | 56 | 11 | 14.4 | 36 | 102 | 35 | 2.8 |
| 33 |  | ETIO 3 | 3.04525 | 7.15127 | 85.3 | 13 | 5 | 6.9 | 246 | 55 | 7 | 12.6 | 30 | 118 | 30 | 2.5 |
| 34 |  | ETIO 4 | 3.04189 | 7.14791 | 85 | 14 | 6 | 7.1 | 142 | 52 | 10 | 15.5 | 23 | 140 | 35 | 3.6 |
| 35 |  | ETIO 5 | 3.04601 | 7.15218 | 85.25 | 13 | 2 | 7 | 300 | 62 | 7 | 18.2 | 36 | 90 | 35 | 2.2 |
| 36 |  | ETIO 6 | 3.04376 | 714,978 | 85.1 | 9 | 2 | 7.1 | 167 | 51 | 6 | 15.5 | 24 | 105 | 42 | 2.6 |
| 37 |  | ETIO 7 | 3.04494 | 7.15066 | 85.4 | 9 | 4 | 6.9 | 382 | 56 | 8 | 18.1 | 31 | 250 | 60 | 1.8 |
| 38 |  | ETIO 8 | 3.04341 | 7.14906 | 84.95 | 11 | 4 | 6.9 | 232 | 75 | 6 | 16.4 | 36 | 120 | 75 | 2.8 |
| 39 |  | ETIO 9 | 3.0456 | 7.15164 | 85.2 | 9 | 5 | 7.1 | 218 | 63 | 10 | 10.6 | 30 | 105 | 78 | 2.2 |
| 40 |  | ETIO 10 | 3.04238 | 7.14828 | 85.05 | 10 | 4 | 7.1 | 318 | 96 | 12 | 17.2 | 33 | 145 | 60 | 2.4 |
| 41 | Ayetoro | ETIM 1 | 3.98765 | 7.12345 | 89.8 | 13 | 4 | 7 | 208 | 52 | 13 | 12.6 | 80 | 100 | 55 | 2.3 |
| 42 |  | ETIM 2 | 3.98781 | 7.1239 | 90.15 | 11 | 5 | 7 | 667 | 96 | 18 | 15.8 | 73 | 106 | 85 | 3.8 |
| 43 |  | ETIM 3 | 3.98802 | 7.12423 | 90.35 | 13 | 4 | 7.1 | 667 | 58 | 18 | 16.2 | 29 | 82 | 40 | 1.5 |
| 44 |  | ETIM 4 | 3.98742 | 7.12378 | 90 | 12 | 3 | 6.9 | 178 | 53 | 10 | 15.5 | 32 | 74 | 30 | 1.6 |
| 45 |  | ETIM 5 | 3.98819 | 7.12456 | 90.25 | 11 | 2 | 6.9 | 471 | 71 | 12 | 20.4 | 39 | 65 | 52 | 1.8 |
| 46 |  | ETIM 6 | 3.98789 | 7.12345 | 90.05 | 9 | 3 | 7.1 | 664 | 56 | 15 | 14.4 | 36 | 65 | 50 | 1.6 |
| 47 |  | ETIM 7 | 3.98765 | 7.12401 | 90.4 | 11 | 4 | 6.9 | 567 | 55 | 16 | 12.6 | 30 | 40 | 45 | 1.9 |
| 48 |  | ETIM 8 | 3.98834 | 7.1239 | 89.95 | 9 | 2 | 6.9 | 566 | 52 | 10 | 15.5 | 23 | 46 | 48 | 1.6 |
| 49 |  | ETIM 9 | 3.98878 | 7.12434 | 90.1 | 11 | 4 | 7 | 368 | 62 | 13 | 18.2 | 36 | 62 | 52 | 1.5 |
| 50 |  | ETIM 10 | 3.98806 | 7.12378 | 90.2 | 11 | 2 | 7.1 | 63 | 51 | 9 | 15.5 | 24 | 70 | 40 | 1.5 |

Where: SC = Sample Code; LONG = Longitude; LAT = Latitude; ALT = Altitude; T.D = Total Depth; SWL = Sttic Water Level; TDS = Total Dissolved Solid

Table S2: Guideline Values Used in the Calculation of the Water Quality Index (WQI)

| **S/N** | **Parameters** | **WHO** | **SON** | **NESREA** | **This Study** |
| --- | --- | --- | --- | --- | --- |
| 1 | pH | 6.5 - 8.5 | 6.5 - 8.5 | 6.5 - 9.2 | 7.5 |
| 2 | Total Dissolved Solids (TDS) | 1000 | 500 | NA | 500 |
| 3 | Ca2+ | 100 - 300 | NA | 200 | 200 |
| 4 | K+ | 200 - 300 | NA | NA | 250 |
| 5 | Na+ | 200 - 300 | 200 | NA | 200 |
| 6 | Mg2+ | NA | 20 | 150 | 20 |
| 7 | SO42- | 250 - 1000 | 100 | 400 | 100 |
| 8 | Cl- | 200 - 300 | 250 | 600 | 250 |

NA - Not Available

Source: National Environmental Standards Regulatory Enforcement Agency (NESREA), 2011; Standard Organization of Nigeria (SON), 2015; and World Health Organization (WHO), 2022

Table S3: Standard dietary reference intake values of various elements and water

| **Life Stage Group** | **Age Group** | **Ca (mg/d)** | |  | **Mg (mg/d)** | |  | **K (mg/d)** | |  | **Na (mg/d)** | |  | **Cl (mg/d)** | | **[TWI](https://www.ncbi.nlm.nih.gov/books/NBK56068/table/summarytables.t4/?report=objectonly" \o "https://www.ncbi.nlm.nih.gov/books/NBK56068/table/summarytables.t4/?report=objectonly)**  **[(L/day)](https://www.ncbi.nlm.nih.gov/books/NBK56068/table/summarytables.t4/?report=objectonly" \o "https://www.ncbi.nlm.nih.gov/books/NBK56068/table/summarytables.t4/?report=objectonly)** |
| --- | --- | --- | --- | --- | --- | --- | --- | --- | --- | --- | --- | --- | --- | --- | --- | --- |
| **RDA/AI** | **UL** |  | **RDA/AI** | **UL** |  | **RDA/AI** | **UL** |  | **RDA/AI** | **UL** |  | **RDA/AI** | **UL** |
| Infants | 0–6 mo | [200*](https://www.ncbi.nlm.nih.gov/books/NBK545442/table/appJ_tab3/?report=objectonly" \o "https://www.ncbi.nlm.nih.gov/books/NBK545442/table/appJ_tab3/?report=objectonly) | 1,000g |  | 30* | ND |  | 400* | ND |  | 110* | ND |  | 180* | ND | 0.7 |
| 7–12 mo | [260*](https://www.ncbi.nlm.nih.gov/books/NBK545442/table/appJ_tab3/?report=objectonly" \o "https://www.ncbi.nlm.nih.gov/books/NBK545442/table/appJ_tab3/?report=objectonly) | 1,500g |  | 75* | ND |  | 860* | ND |  | 370* | ND |  | 570* | ND | 0.8 |
| Children | 1–3 y | 700 | 2500 |  | 80 | 65 |  | 2,000* | ND |  | 800* | ND |  | 1500* | 2.3 | 1.3 |
| 4–8 y | 1,000 | 2,500 |  | 130 | 110 |  | 2,300* | ND |  | 1,000* | ND |  | 1900* | 2.9 | 1.7 |
| Males | 9–13 y | 1,300 | 3,000 |  | 240 | 350 |  | 2,500* | ND |  | 1,200* | ND |  | 2300* | 3.4 | 2.4 |
| 14–18 y | 1,300 | 3 000 |  | 410 | 350 |  | 3,000* | ND |  | 1,500* | ND |  | 2300* | 3.6 | 3.3 |
| 19–30 y | 1,000 | 2,500 |  | 400 | 350 |  | 3,400* | ND |  | 1,500* | ND |  | 2300* | 3.6 | 3.7 |
| 31–50 y | 1,000 | 2,500 |  | 420 | 350 |  | 3,400* | ND |  | 1,500* | ND |  | 2300* | 3.6 | 3.7 |
| 51–70 y | 1,000 | 2,000 |  | 420 | 350 |  | 3,400* | ND |  | 1,500* | ND |  | 2000* | 3.6 | 3.7 |
| > 70 y | 1,200 | 2,000 |  | 420 | 350 |  | 3,400* | ND |  | 1,500* | ND |  | 1800* | 3.6 | 3.7 |
| Females | 9–13 y | 1,300 | 3,000 |  | 240 | 350 |  | 2,300* | ND |  | 1,200* | ND |  | 2300* | 3.4 | 2.1 |
| 14–18 y | 1,300 | 3,000 |  | 360 | 350 |  | 2,300* | ND |  | 1,500* | ND |  | 2300* | 3.6 | 2.3 |
| 19–30 y | 1,000 | 2,500 |  | 310 | 350 |  | 2,600* | ND |  | 1,500* | ND |  | 2300* | 3.6 | 2.7 |
| 31–50 y | 1,000 | 2,500 |  | 320 | 350 |  | 2,600* | ND |  | 1,500* | ND |  | 2300* | 3.6 | 2.7 |
| 51–70 y | 1,200 | 2,000 |  | 320 | 350 |  | 2,600* | ND |  | 1,500* | ND |  | 2000* | 3.6 | 2.7 |
| > 70 y | 1,200 | 2,000 |  | 320 | 350 |  | 2,600* | ND |  | 1,500* | ND |  | 1800* | 3.6 | 2.7 |
| Pregnancy | 14–18 y | 1,300 | 3,000 |  | 400 | 350 |  | 2,600* | ND |  | 1,500* | ND |  | 2300* | 3.6 | 3 |
| 19–30 y | 1,000 | 2,500 |  | 350 | 350 |  | 2,900* | ND |  | 1,500* | ND |  | 2300* | 3.6 | 3 |
| 31–50 y | 1,000 | 2,500 |  | 360 | 350 |  | 2,900* | ND |  | 1,500* | ND |  | 2300* | 3.6 | 3 |
| Lactation | 14–18 y | 1,300 | 3,000 |  | 360 | 350 |  | 2,500* | ND |  | 1,500* | ND |  | 2300* | 3.6 | 3.8 |
| 19–30 y | 1,000 | 2,500 |  | 310 | 350 |  | 2,800* | ND |  | 1,500* | ND |  | 2300* | 3.6 | 3.8 |
| 31–50 y | 1,000 | 2,500 |  | 320 | 350 |  | 2,800* | ND |  | 1,500* | ND |  | 2300* | 3.6 | 3.8 |

Where: mo = month(s); y = year(s); TWI = Total Water Intake; Values with asterisk are Adequate Intake (AI) and those without are Recommended Dietary Allowance (RDA); UL = Tolerable Upper Intake Level
Source: IOM (2005; 2011); NASEM (2019a; 2019b)

Table S4: Quality Quotients of Groundwater in Yewa

| **SC** | **pH** | **TDS** | **Ca2+** | **K+** | **Na+** | **Mg2+** | **SO42-** | **Cl-** | **WQI** |
| --- | --- | --- | --- | --- | --- | --- | --- | --- | --- |
| ETIL 1 | 3.97 | 0.17 | 0.96 | 0.11 | 0.26 | 49.33 | 2.78 | 0.02 | 57.61 |
| ETIL 2 | 3.97 | 0.15 | 0.87 | 0.08 | 0.18 | 45.54 | 1.77 | 0.02 | 52.58 |
| ETIL 3 | - | 0.39 | 0.96 | 0.08 | 0.16 | 37.95 | 5.57 | 0.02 | 45.13 |
| ETIL 4 | - | 0.31 | 0.73 | 0.06 | 0.20 | 29.09 | 2.02 | 0.02 | 32.44 |
| ETIL5 | 3.97 | 0.47 | 0.67 | 0.05 | 0.23 | 45.54 | 1.77 | 0.02 | 52.72 |
| ETIL 6 | 3.97 | 0.24 | 0.85 | 0.08 | 0.23 | 115.10 | 1.52 | 0.02 | 122.01 |
| ETIL7 | 3.97 | 0.06 | 1.19 | 0.10 | 0.18 | 108.78 | 1.77 | 0.03 | 116.08 |
| ETIL 8 | 3.97 | 0.65 | 1.13 | 0.12 | 0.51 | 158.11 | 2.13 | 0.03 | 166.64 |
| ETIL 9 | - | 1.15 | 0.70 | 0.10 | 0.18 | 103.72 | 1.92 | 0.02 | 107.79 |
| ETIL 10 | 3.97 | 0.45 | 0.66 | 0.08 | 0.19 | 92.34 | 2.13 | 0.02 | 99.83 |
| ETOD 1 | 3.97 | 0.48 | 0.73 | 0.10 | 0.23 | 83.48 | 3.04 | 0.01 | 92.04 |
| ETOD 2 | - | 0.48 | 0.65 | 0.11 | 0.20 | 106.25 | 3.79 | 0.02 | 111.50 |
| ETOD 3 | 3.97 | 0.49 | 0.78 | 0.08 | 0.23 | 113.84 | 3.95 | 0.02 | 123.36 |
| ETOD 4 | 3.97 | 0.36 | 0.92 | 0.12 | 0.27 | 121.43 | 3.04 | 0.02 | 130.13 |
| ETOD 5 | 3.97 | 0.47 | 0.80 | 0.10 | 0.16 | 101.19 | 4.05 | 0.01 | 110.75 |
| ETOD 6 | 3.97 | 0.22 | 1.04 | 0.11 | 0.19 | 96.13 | 3.79 | 0.01 | 105.47 |
| ETOD 7 | 3.97 | 0.25 | 0.92 | 0.10 | 0.23 | 83.48 | 3.04 | 0.01 | 91.99 |
| ETOD 8 | - | 0.05 | 0.65 | 0.11 | 0.20 | 104.99 | 4.30 | 0.01 | 110.30 |
| ETOD 9 | 3.97 | 0.29 | 0.70 | 0.08 | 0.23 | 115.10 | 6.58 | 0.03 | 126.98 |
| ETOD 10 | - | 0.49 | 0.73 | 0.11 | 0.22 | 108.78 | 3.04 | 0.02 | 113.39 |
| ETAY 1 | 3.97 | 1.46 | 0.71 | 0.06 | 0.23 | 39.21 | 2.02 | 0.01 | 47.68 |
| ETAY 2 | 3.97 | 0.25 | 0.95 | 0.08 | 0.21 | 45.54 | 1.77 | 0.01 | 52.78 |
| ETAY 3 | 3.97 | 0.19 | 0.80 | 0.10 | 0.13 | 37.95 | 1.82 | 0.01 | 44.97 |
| ETAY 4 | - | 0.68 | 0.70 | 0.10 | 0.22 | 41.74 | 2.28 | 0.01 | 45.73 |
| ETAY 5 | 3.97 | 0.10 | 0.73 | 0.12 | 0.23 | 32.89 | 3.04 | 0.01 | 41.09 |
| ETAY 6 | 3.97 | 0.27 | 0.77 | 0.09 | 0.20 | 43.01 | 2.53 | 0.01 | 50.84 |
| ETAY 7 | 3.97 | 0.66 | 0.73 | 0.08 | 0.19 | 39.21 | 2.02 | 0.01 | 46.89 |
| ETAY 8 | 3.97 | 0.35 | 0.71 | 0.07 | 0.21 | 45.54 | 2.78 | 0.01 | 53.64 |
| ETAY 9 | - | 0.78 | 0.75 | 0.13 | 0.17 | 37.95 | 1.77 | 0.01 | 41.55 |
| ETAY 10 | 3.97 | 0.29 | 0.81 | 0.06 | 0.18 | 92.34 | 5.57 | 0.02 | 103.23 |
| ETIO 1 | 3.97 | 0.49 | 0.90 | 0.10 | 0.26 | 49.33 | 2.02 | 0.02 | 57.08 |
| ETIO 2 | - | 0.54 | 0.71 | 0.09 | 0.18 | 45.54 | 1.77 | 0.02 | 48.85 |
| ETIO 3 | 3.97 | 0.50 | 0.70 | 0.06 | 0.16 | 37.95 | 1.52 | 0.02 | 44.86 |
| ETIO 4 | 3.97 | 0.29 | 0.66 | 0.08 | 0.20 | 29.09 | 1.77 | 0.03 | 36.08 |
| ETIO 5 | - | 0.61 | 0.78 | 0.06 | 0.23 | 45.54 | 1.77 | 0.02 | 49.00 |
| ETIO 6 | 3.97 | 0.34 | 0.65 | 0.05 | 0.20 | 30.36 | 2.13 | 0.02 | 37.70 |
| ETIO 7 | 3.97 | 0.77 | 0.71 | 0.06 | 0.23 | 39.21 | 3.04 | 0.01 | 48.00 |
| ETIO 8 | 3.97 | 0.47 | 0.95 | 0.05 | 0.21 | 45.54 | 3.79 | 0.02 | 55.00 |
| ETIO 9 | 3.97 | 0.44 | 0.80 | 0.08 | 0.13 | 37.95 | 3.95 | 0.02 | 47.33 |
| ETIO 10 | 3.97 | 0.64 | 1.21 | 0.10 | 0.22 | 41.74 | 3.04 | 0.02 | 50.94 |
| ETIM 1 | - | 0.42 | 0.66 | 0.11 | 0.16 | 101.19 | 2.78 | 0.02 | 105.34 |
| ETIM 2 | - | 1.35 | 1.21 | 0.15 | 0.20 | 92.34 | 4.30 | 0.03 | 99.58 |
| ETIM 3 | 3.97 | 1.35 | 0.73 | 0.15 | 0.20 | 36.68 | 2.02 | 0.01 | 45.12 |
| ETIM 4 | 3.97 | 0.36 | 0.67 | 0.08 | 0.20 | 40.48 | 1.52 | 0.01 | 47.28 |
| ETIM 5 | 3.97 | 0.95 | 0.90 | 0.10 | 0.26 | 49.33 | 2.63 | 0.01 | 58.15 |
| ETIM 6 | 3.97 | 1.34 | 0.71 | 0.12 | 0.18 | 45.54 | 2.53 | 0.01 | 54.40 |
| ETIM 7 | 3.97 | 1.15 | 0.70 | 0.13 | 0.16 | 37.95 | 2.28 | 0.02 | 46.34 |
| ETIM 8 | 3.97 | 1.15 | 0.66 | 0.08 | 0.20 | 29.09 | 2.43 | 0.01 | 37.58 |
| ETIM 9 | - | 0.74 | 0.78 | 0.11 | 0.23 | 45.54 | 2.63 | 0.01 | 50.04 |
| ETIM 10 | 3.97 | 0.13 | 0.65 | 0.07 | 0.20 | 30.36 | 2.02 | 0.01 | 37.40 |

Where: SC = Sample Code; WQI = Water Quality Index

Table S5: Interpretation of Water Quality Index of Groundwater in Yewa

| **WQI Values** | **WQS** | **Sample Code** | **N** | **S%** | **Possible Usage** |
| --- | --- | --- | --- | --- | --- |
| <50 | Excellent | ETAY 1, ETAY 3, ETAY 4, ETAY 5, ETAY 7, ETAY 9, ETIL 3, ETIL 4, ETIM 3, ETIM 4, ETIM 7, ETIM 8, ETIM 10, ETIO 2, ETIO 3, ETIO 4, ETIO 5, ETIO 6, ETIO 7, ETIO 9 | 20 | 40.00 | Drinking, Irrigation and Industrial |
| 50 - 100 | Good | ETAY 6, ETIL 1, ETIL 2, ETIL 5, ETIL 10, ETIM 2, ETIM 5, ETIM 6, ETIM 9, ETIO 1, ETIO 8, ETIO 10, ETOD 1, ETOD 7 | 16 | 32.00 | Drinking, Irrigation and Industrial |
| 100 - 200 | Poor | ETAY 10, ETIL 6, ETIL 7, ETIL 8, ETIL 9, ETIM 1, ETOD 2, ETOD 3, ETOD 4, ETOD 5, ETOD 6, ETOD 8, ETOD 9, ETOD 10 | 14 | 28.00 | Irrigation and Industrial |
| 200 - 300 | Very Poor | None | - | - | Irrigation |
| >300 | Unsuitable | None | - | - | Proper treatment required before use |

Where: WQI = Water Quality Index; WQS = Water Quality Status; N = Number of Samples; S% = Percentage of Samples

Table S6: Hydrogeochemical Indices and Irrigation Suitability of Groundwater in Yewa

| **SC** | **CA I** | **CA II** | **SAR** | **RSC** | **MAR** | **MH** | **KR** | **PI** | **PS** | **TH** | **CR** | **CBR/RI** | **%Na** | **SSP** | **BH** |
| --- | --- | --- | --- | --- | --- | --- | --- | --- | --- | --- | --- | --- | --- | --- | --- |
| ETIL 1 | -5.71 | -0.09 | 0.38 | -3.07 | 45.82 | 0.46 | 0.13 | 36.40 | 0.65 | 22.63 | 0.33 | 0.02 | 15.11 | 11.26 | -3.07 |
| ETIL 2 | -4.48 | -0.14 | 0.28 | -4.93 | 46.23 | 0.46 | 0.10 | 26.19 | 0.43 | 20.75 | 0.58 | 0.05 | 12.11 | 8.91 | -4.93 |
| ETIL 3 | -2.70 | -0.06 | 0.24 | -5.00 | 39.41 | 0.39 | 0.09 | 24.55 | 1.22 | 19.60 | 1.98 | 0.06 | 11.38 | 8.05 | -5.00 |
| ETIL 4 | -5.94 | -0.25 | 0.34 | -4.05 | 39.52 | 0.40 | 0.14 | 28.08 | 0.48 | 14.99 | 1.31 | 0.09 | 15.52 | 12.35 | -4.05 |
| ETIL5 | -7.08 | -0.31 | 0.39 | -4.56 | 52.82 | 0.53 | 0.14 | 28.39 | 0.44 | 18.75 | 0.83 | 0.08 | 14.43 | 12.38 | -4.56 |
| ETIL 6 | -6.79 | -0.27 | 0.30 | -9.75 | 69.12 | 0.69 | 0.07 | 15.86 | 0.38 | 39.04 | 0.69 | 0.07 | 8.92 | 6.92 | -9.75 |
| ETIL7 | -2.15 | -0.12 | 0.22 | -10.80 | 60.12 | 0.60 | 0.05 | 12.99 | 0.47 | 40.72 | 0.93 | 0.11 | 7.35 | 5.06 | -10.80 |
| ETIL 8 | -12.45 | -0.26 | 0.57 | -10.79 | 69.83 | 0.70 | 0.12 | 22.66 | 0.54 | 53.25 | 0.27 | 0.03 | 12.66 | 10.62 | -10.79 |
| ETIL 9 | -3.85 | -0.11 | 0.26 | -8.01 | 71.07 | 0.71 | 0.07 | 18.27 | 0.46 | 34.51 | 0.62 | 0.05 | 9.03 | 6.28 | -8.01 |
| ETIL 10 | -4.53 | -0.14 | 0.28 | -7.22 | 69.82 | 0.70 | 0.08 | 19.81 | 0.51 | 31.10 | 0.74 | 0.05 | 9.64 | 7.14 | -7.22 |
| ETOD 1 | -8.38 | -0.21 | 0.33 | -7.58 | 65.22 | 0.65 | 0.09 | 18.03 | 0.68 | 29.49 | 1.86 | 0.07 | 11.58 | 8.60 | -7.58 |
| ETOD 2 | -3.01 | -0.07 | 0.28 | -7.49 | 73.08 | 0.73 | 0.07 | 20.51 | 0.86 | 34.68 | 0.88 | 0.04 | 9.85 | 6.66 | -7.49 |
| ETOD 3 | -7.78 | -0.14 | 0.31 | -8.76 | 70.52 | 0.71 | 0.08 | 18.76 | 0.87 | 38.08 | 1.02 | 0.04 | 9.15 | 7.09 | -8.76 |
| ETOD 4 | -7.09 | -0.13 | 0.34 | -9.16 | 68.43 | 0.68 | 0.08 | 19.83 | 0.69 | 41.48 | 0.59 | 0.03 | 10.23 | 7.47 | -9.16 |
| ETOD 5 | -4.35 | -0.05 | 0.22 | -7.82 | 67.67 | 0.68 | 0.06 | 18.76 | 0.88 | 34.83 | 0.95 | 0.02 | 8.08 | 5.34 | -7.82 |
| ETOD 6 | -4.98 | -0.09 | 0.25 | -9.10 | 60.43 | 0.60 | 0.06 | 16.15 | 0.83 | 35.85 | 1.36 | 0.04 | 8.97 | 6.01 | -9.10 |
| ETOD 7 | -10.26 | -0.16 | 0.31 | -7.68 | 59.84 | 0.60 | 0.09 | 19.93 | 0.67 | 31.36 | 0.98 | 0.03 | 10.73 | 7.95 | -7.68 |
| ETOD 8 | -6.01 | -0.08 | 0.28 | -7.81 | 72.84 | 0.73 | 0.07 | 19.14 | 0.93 | 34.35 | 1.22 | 0.03 | 9.93 | 6.71 | -7.81 |
| ETOD 9 | -4.52 | -0.10 | 0.31 | -8.43 | 73.17 | 0.73 | 0.08 | 19.43 | 1.45 | 37.54 | 1.64 | 0.05 | 9.36 | 7.26 | -8.43 |
| ETOD 10 | -4.66 | -0.12 | 0.30 | -8.57 | 70.96 | 0.71 | 0.08 | 18.07 | 0.70 | 36.23 | 1.01 | 0.05 | 10.06 | 7.06 | -8.57 |
| ETAY 1 | -12.78 | -0.24 | 0.39 | -3.97 | 47.71 | 0.48 | 0.15 | 31.98 | 0.46 | 17.44 | 0.67 | 0.03 | 15.66 | 12.85 | -3.97 |
| ETAY 2 | -9.15 | -0.18 | 0.31 | -5.13 | 44.17 | 0.44 | 0.11 | 26.53 | 0.41 | 21.49 | 0.52 | 0.03 | 12.64 | 9.62 | -5.13 |
| ETAY 3 | -2.22 | -0.06 | 0.22 | -4.50 | 43.97 | 0.44 | 0.08 | 24.98 | 0.42 | 17.97 | 0.76 | 0.04 | 12.04 | 7.60 | -4.50 |
| ETAY 4 | -8.78 | -0.17 | 0.37 | -4.15 | 49.72 | 0.50 | 0.14 | 30.51 | 0.51 | 17.99 | 0.79 | 0.03 | 16.20 | 12.06 | -4.15 |
| ETAY 5 | -6.87 | -0.15 | 0.39 | -4.05 | 42.49 | 0.42 | 0.16 | 30.52 | 0.68 | 16.00 | 1.40 | 0.05 | 18.82 | 13.47 | -4.05 |
| ETAY 6 | -6.74 | -0.16 | 0.32 | -4.73 | 47.88 | 0.48 | 0.12 | 26.56 | 0.57 | 19.07 | 1.04 | 0.05 | 14.07 | 10.35 | -4.73 |
| ETAY 7 | -7.16 | -0.15 | 0.33 | -3.94 | 46.83 | 0.47 | 0.12 | 31.05 | 0.47 | 17.69 | 0.62 | 0.03 | 14.54 | 10.96 | -3.94 |
| ETAY 8 | -9.71 | -0.21 | 0.35 | -4.85 | 51.44 | 0.51 | 0.12 | 25.71 | 0.62 | 19.12 | 1.39 | 0.05 | 14.09 | 11.03 | -4.85 |
| ETAY 9 | -2.81 | -0.07 | 0.29 | -4.12 | 45.59 | 0.46 | 0.11 | 28.81 | 0.41 | 17.48 | 0.64 | 0.04 | 15.61 | 9.86 | -4.12 |
| ETAY 10 | -4.23 | -0.09 | 0.25 | -7.74 | 65.28 | 0.65 | 0.07 | 18.60 | 1.22 | 32.60 | 1.71 | 0.05 | 8.21 | 6.30 | -7.74 |
| ETIO 1 | -7.58 | -0.17 | 0.39 | -4.62 | 47.51 | 0.48 | 0.13 | 30.73 | 0.48 | 22.01 | 0.45 | 0.03 | 15.04 | 11.62 | -4.62 |
| ETIO 2 | -3.37 | -0.11 | 0.30 | -4.08 | 51.44 | 0.51 | 0.11 | 30.08 | 0.44 | 19.12 | 0.52 | 0.05 | 13.63 | 9.82 | -4.08 |
| ETIO 3 | -4.24 | -0.11 | 0.27 | -3.28 | 47.34 | 0.47 | 0.11 | 33.66 | 0.38 | 16.98 | 0.39 | 0.04 | 12.25 | 9.52 | -3.28 |
| ETIO 4 | -3.12 | -0.10 | 0.36 | -2.19 | 42.16 | 0.42 | 0.15 | 42.42 | 0.47 | 14.24 | 0.39 | 0.04 | 17.17 | 13.07 | -2.19 |
| ETIO 5 | -8.88 | -0.24 | 0.37 | -4.58 | 48.90 | 0.49 | 0.13 | 29.31 | 0.43 | 19.87 | 0.57 | 0.04 | 13.82 | 11.57 | -4.58 |
| ETIO 6 | -6.10 | -0.17 | 0.36 | -2.80 | 43.68 | 0.44 | 0.15 | 38.25 | 0.51 | 14.45 | 0.59 | 0.04 | 15.49 | 12.99 | -2.80 |
| ETIO 7 | -10.48 | -0.10 | 0.39 | -1.25 | 47.71 | 0.48 | 0.15 | 45.86 | 0.68 | 17.44 | 0.34 | 0.01 | 15.66 | 12.85 | -1.25 |
| ETIO 8 | -6.09 | -0.13 | 0.31 | -4.74 | 44.17 | 0.44 | 0.11 | 28.53 | 0.86 | 21.49 | 0.88 | 0.04 | 11.45 | 9.62 | -4.74 |
| ETIO 9 | -2.31 | -0.04 | 0.22 | -3.89 | 43.97 | 0.44 | 0.08 | 29.20 | 0.87 | 17.97 | 1.03 | 0.04 | 11.33 | 7.60 | -3.89 |
| ETIO 10 | -5.52 | -0.10 | 0.30 | -5.13 | 36.16 | 0.36 | 0.10 | 27.75 | 0.69 | 23.10 | 0.59 | 0.03 | 12.33 | 9.07 | -5.13 |
| ETIM 1 | -2.33 | -0.05 | 0.23 | -7.53 | 71.71 | 0.72 | 0.06 | 18.81 | 0.64 | 33.46 | 0.78 | 0.04 | 8.76 | 5.64 | -7.53 |
| ETIM 2 | -1.12 | -0.03 | 0.25 | -9.06 | 55.62 | 0.56 | 0.06 | 17.47 | 0.99 | 36.59 | 1.15 | 0.06 | 9.61 | 5.99 | -9.06 |
| ETIM 3 | -4.78 | -0.09 | 0.35 | -3.94 | 45.18 | 0.45 | 0.13 | 31.15 | 0.46 | 17.01 | 0.69 | 0.03 | 18.08 | 11.78 | -3.94 |
| ETIM 4 | -8.28 | -0.20 | 0.34 | -4.06 | 49.88 | 0.50 | 0.13 | 29.84 | 0.36 | 17.40 | 0.59 | 0.04 | 14.99 | 11.33 | -4.06 |
| ETIM 5 | -10.44 | -0.24 | 0.39 | -5.68 | 47.51 | 0.48 | 0.13 | 25.14 | 0.59 | 22.01 | 1.13 | 0.05 | 15.04 | 11.62 | -5.68 |
| ETIM 6 | -4.38 | -0.09 | 0.30 | -4.69 | 51.44 | 0.51 | 0.11 | 25.99 | 0.57 | 19.12 | 1.08 | 0.04 | 14.93 | 9.82 | -4.69 |
| ETIM 7 | -1.60 | -0.05 | 0.27 | -4.56 | 47.34 | 0.47 | 0.11 | 23.58 | 0.52 | 16.98 | 1.60 | 0.08 | 15.52 | 9.52 | -4.56 |
| ETIM 8 | -8.28 | -0.21 | 0.36 | -3.73 | 42.16 | 0.42 | 0.15 | 29.89 | 0.54 | 14.24 | 1.47 | 0.06 | 17.17 | 13.07 | -3.73 |
| ETIM 9 | -9.86 | -0.20 | 0.37 | -5.04 | 48.90 | 0.49 | 0.13 | 26.29 | 0.58 | 19.87 | 1.17 | 0.04 | 15.66 | 11.57 | -5.04 |
| ETIM 10 | -9.50 | -0.20 | 0.36 | -3.37 | 43.68 | 0.44 | 0.15 | 33.61 | 0.46 | 14.45 | 0.81 | 0.04 | 16.68 | 12.99 | -3.37 |

Where SC = Sample Code, CA 1 and CA II are Chloroalkaline Indices, SAR = Sodium Adsorption Ratio, RSC = Residual Salinity, MAR = Magnesium Adsorption Ratio, MH = Magnesium Hazard, KR = Kelly’s Ratio, PI = Permeability Index, PS = Potential Salinity, CR = Corrosivity Ratio, CBR/RI = Chloride-Bicarbonate Ratio (CBR) / Revelle Index (RI), %Na = Percentage Sodium, SSP = Soluble Sodium Percentage, BH = Bicarbonate Hazard

Table S7: PCA Eigenvalues with corresponding percentage variance

| **PC** | **Eigenvalue** | **% variance** |
| --- | --- | --- |
| **1** | **32148.3** | **90.413** |
| **2** | **2130.83** | **5.9927** |
| **3** | **762.777** | **2.1452** |
| **4** | **366.801** | **1.0316** |
| **5** | **125.363** | **0.35257** |
| **6** | **9.78493** | **0.027519** |
| **7** | **7.26536** | **0.020433** |
| **8** | **4.95307** | **0.01393** |
| **9** | **1.02502** | **0.0028827** |
| 10 | 0.198059 | 0.00055701 |
| 11 | 0.00618231 | 1.7387E-05 |
